# Supplementary material for: Activity in Inferior Parietal and Medial Prefrontal Cortex Signals the Accumulation of Evidence in a Probability Learning Task
Source: PLoS Comput Biol. 2013 Jan 31;9(1):e1002895. doi: 10.1371/journal.pcbi.1002895 (PMC3561043; doi:10.1371/journal.pcbi.1002895)
Supplement: Text S1 — Supplementary information. Text S1 provides additional methods, results, figures, and tables. (PDF) [file pcbi.1002895.s001.pdf]

# Activity in inferior parietal and medial prefrontal cortex signals the accumulation of evidence in a probability learning task.

## Supplementary Information

Mathieu d'Acremont, Eleonora Fornari, and Peter Bossaerts

### Contents

|                                                        |          |
|--------------------------------------------------------|----------|
| <b>1 Behavioral choice</b>                             | <b>2</b> |
| <b>2 Brain analysis</b>                                | <b>2</b> |
| 2.1 Preprocessing . . . . .                            | 2        |
| 2.2 Voxel-based analysis . . . . .                     | 3        |
| 2.3 ROI analysis . . . . .                             | 3        |
| 2.4 Brain response to stimulus probabilities . . . . . | 4        |
| 2.5 Brain response to value and uncertainty . . . . .  | 4        |
| <b>3 Task</b>                                          | <b>4</b> |
| 3.1 Instructions . . . . .                             | 4        |
| 3.2 Duration and message . . . . .                     | 5        |
| <b>4 Figures</b>                                       | <b>6</b> |
| <b>5 Tables</b>                                        | <b>9</b> |

# 1 Behavioral choice

Choices were recorded on 9 bins for 22 subjects. For the 23<sup>th</sup> subject, decisions were not recorded on the 8<sup>th</sup> bin because of a technical problem with the goggle. Analyses in the active condition were performed with 72 choices per subject (64 for the 23<sup>th</sup> subject). The total number of observations is reported in the footnote of each table.

Payoffs in the active decision condition were not revealed to the participants. They were revealed in the control decision condition. This information could be used to further learn probabilities during the decision period. However, they were not taken into account in the analyses because results showed that their inclusion did not lead to a better fit of the logistic regressions explaining choices. Thus probabilities were calculated based the drawings of the learning period only.

Due to the limited number of data, parameters of the prospect theory models (loss aversion, diminishing sensitivity, etc.) were estimated after merging the choices of all subjects and individual differences were ignored. However to test the prevalence of probabilistic sophistication, we compared the fit of models M4 (probabilities conditional on the hidden states) and M4a (probabilities conditional on the observed payoffs) at the individual level [1]. To avoid double dipping, a cross-validation was performed:

1. For each subject, prospect theory parameters were estimated based on all other subjects (hold-out) by maximizing the likelihood; this was done separately for models M4 and M4a;
2. For each subject, models M4 and M4a and the prospect theory parameters estimated in the previous step were used to predict their own choices, this led to a different likelihood for each subject; the BIC was then calculated based on the likelihood;
3. A paired t-test on the BIC was calculated to compare the fit of the two models; this way individual differences were taken into account; double dipping was avoided because of the hold-out (step 1).

The paired t-test showed that the BIC was significantly smaller for model M4 compared to M4a ( $t(22) = -40.26, p < .001$ ). Thus the model based on hidden state inference better explained the observed choices. The BIC differences favored model M4 for all subjects (Fig. S2)

# 2 Brain analysis

BOLD fMRI acquisitions were performed with a 12 channels head coil on a 3 T Siemens Tim-Trio system. Functional MRI images were acquired with an EPI gradient echo T2\*-weighted sequence (FA 90, TE 30, pixel size 3x3 [mm], acquisition time 1.9 [s], 32 slices of 3 [mm] thickness, covering the whole brain) with a TR = 2 [s].

High resolution morphological acquisition was acquired with a sagittal T1-weighted 3D gradient-echo sequence (MPRAGE), 160 slices (with voxel size of 1x1x1 [mm]), as a structural basis for brain segmentation and surface reconstruction.

Voxel-based and ROI analyses were done on 9 bins for 22 subjects. For the 23<sup>th</sup> subject, data were acquired for the first 7 bins only because of a technical problem with the goggle that occurred during the 8<sup>th</sup> bin. See table footnotes for the total number of observations.

## 2.1 Preprocessing

fMRI preprocessing steps, conducted with SPM8 (Wellcome Department of Cognitive Neurology, London, UK), included realignment of intra-session acquisitions to correct for head movement, normalization to a standard template (Montreal Neurological Institute template, MNI) to minimize inter-participant morphological variability and resampling to isotropic voxel of 2x2x2 [mm] to improve superposition of functional results and morphological acquisitions, and convolution with an isotropic Gaussian kernel (FWHM = 6 [mm]) to increase signal-to-noise ratio. The signal drift across acquisitions was removed with high-pass filter (only signals with a period < 240 [s] were included).

## 2.2 Voxel-based analysis

Subject was defined as a random factor in General Linear Models (GLM). The default orthogonalization of predictors was removed, otherwise the predictor order changes the results. The following GLM was set for the voxel-based analysis (GLM1). In the learning phase, the stimulus (payoff) was defined as an 1 [s] event in the GLM. The stimulus was modulated by its probability of occurrence calculated conditional on the past hidden states (model M4, Fig. S1). To model the absence of stimulus in the center and presence of colored ball in the periphery, a slice event was defined from the beginning of the learning phase to the end, but was “turned off” when the stimulus was displayed in the center of the bin.

A decision active event was defined starting from the display of the price (“Do you want to pay X Frs to play this bin”) and the message asking for a response (“Yes / No”). This event lasted 3 [s]. In the control decision condition, a decision event was defined in the same way <sup>1</sup>. The decision active event was modulated by the Expected value, Outcome entropy, Expected value x Outcome entropy (interaction), and Choice entropy. The decision control event was modulated by the Net payoff (payoff minus price) and the Outcome entropy. Six events were defined for messages indicating: (1) the beginning of the sampling and resampling stages (“New composition / New outcomes” or “Same composition / New outcomes”), (2) the beginning of the learning phase (“Sampling period”), (3) the beginning of the decision phase (“Playing period”), (4) the call for a response (“Yes / No”), (5) the response feed-back (“Outcome recorded” or “Gamble passed”), and (6) the payoff feedback (“our net payoff [...]"). The payoff feed-back message was modulated by the total net payoff of the current decision phase (sum of the six payoffs minus sum of the six prices).

To test the effect of value, the stimulus was modulated by a prediction error (GLM2). The prediction error was the expected payoff calculated after the drawing was revealed minus the expected payoff calculated before the drawing was revealed (change in expected payoff). Expected payoff was calculated with probabilities inferred from states (model M4). To analyze the effect of valence, separate events were defined within a single GLM based on the sign of the prediction error they generated (GLM3).

## 2.3 ROI analysis

To define ROIs, GLM1 was modified to include two types of probabilities in the learning phase (GLM4): (a) the probabilities calculated conditional on the hidden states (model M4, Fig. S1) and (b) the probabilities calculated conditional on the observed payoffs (model M4a, Fig. S1). Secondly, a contrast assessing the joint effect of the two types of probabilities was defined. With this approach, none of the two covariates was favored in the definition of the ROIs. Significant voxels found at the group level were used to define 3 ROIs encoding probabilities: medial prefrontal cortex, left and right angular gyrus. Significant voxels were used to define 2 ROIs encoding entropy during the active decision phase: the bilateral insula and the dorsal anterior cingulate. To avoid circularity or “double dipping”, ROIs for each individual were determined based on the data of all other participants [2].

The GLM for the ROI analysis was the same as the other GLMs except that a different event was defined for each stimulus (display of a payoff) and each decision message (“Do you want to pay X Frs to play this bin”). These events were not modulated by covariates (GLM5). This GLM was fitted to the brain functional data and Marsbar toolbox was used to extract the first component score of all voxels in a given ROI [3]. This was done for each subject separately. Because ROIs for each subject were estimated without the subject himself, circularity was avoided. Estimated betas were imported in R [4]. In R, mixed linear and mixed non-linear models were computed to predict these GLM betas estimated with Marsbar (an individual beta was obtained for each stimulus and each decision). In line with the GLMs, Subject was defined as a random factor in R mixed models. Probabilities were centered at 0.5 (except in Tables S8 & S9), the number of colors was centered at 5, and all other predictors were scaled. The total number of observations is reported in the table footnotes.

Functional connectivity was analyzed with Psycho-Physiological Interaction (PPI) in SPM. ROIs encoding probabilities were used as seed regions. A first analysis was conducted on all acquired images and the learning phase was defined as an experimental factor (GLM6). This factor equaled 1 during the learning phase, 0 otherwise. The interaction between this factor and BOLD response was entered in the PPI to test if connectivity increased during the learning phase. The GLM also included a predictor for the 1 [s] stimuli shown during the learning period and its probability. Thus the PPI interaction

---

<sup>1</sup>Defining decision events starting from the display of the price and ending with the participant response led to the same results

term tested for an increase in connectivity during the learning period after controlling for the stimulus presentation and its probability of occurrence. A second connectivity analysis was conducted on the images acquired during the resting phase only and did not include an experimental factor (GLM7). Like for all other voxel-based GLMs, connectivity analyses included realignment regressors to control for head motion [5].

## 2.4 Brain response to stimulus probabilities

We conducted supplementary analyses to test if the brain was encoding the probabilities of the stimuli conditional on the hidden states or the observed payoffs. The two type of probabilities converge as the number of sample increases and are thus strongly related. They are identical in the initial sampling phase ( $r = 1$ ), and highly correlated in the resample phase ( $r = .92, p < .001$ , see Fig. S1). As a consequence, when stimulus probabilities inferred from past payoffs instead of past colors were entered in the GLM, similar activation was observed. It is thus difficult to disentangle their effect at the level of voxels.

To increase statistical power, analysis on the ROIs encoding probabilities was performed. The ROIs are the clusters of significant voxels found with GLM4 and the contrast summing the effect the two types of probabilities (inferred from the hidden states or the observed payoffs). Average BOLD response in ROIs during the resampling stage (GLM5) was used as a criterion in R mixed-linear regressions (the two types of probabilities do not differ in the first sampling stage). Results showed a significant effect of the probabilities inferred from the hidden states ( $P = .02$ ) but not for the probabilities inferred from the observed payoffs ( $P = .33$ , Table S20). The location of the ROI did not interact with probabilities inferred from the hidden states ( $F(2, 7340) = 0.73, P = .48$ ) or the observed payoffs ( $F(2, 7340) = 0.63, P = .53$ ). Thus, the three ROIs appeared to encode probabilities inferred from hidden states and not the observed consequences.

## 2.5 Brain response to value and uncertainty

In the decision period, voxel-based analysis showed that BOLD response in dorsal anterior cingulate cortex increased with choice entropy. BOLD response in bilateral insula increased for gambles combining high expected value and high outcome entropy. Voxels significantly activated by these variables were used to define ROIs (GLM4). Average BOLD response in ROIs during the decision stage (GLM5) was used as a criterion in R mixed-linear regressions. A location variable was created and set to 1 for the anterior cingulate and 0 for the left and right insula. Results showed a significant and positive interaction Location x Choice entropy ( $t(4894) = 4.03, p < .001$ ). Thus the effect of choice entropy was significantly stronger in the dorsal anterior cingulate. The triple interaction Location x Expected value x Outcome entropy was not significant ( $t(4890) = -0.60, p = .55$ ). Thus the interaction Expected value x Outcome entropy was not stronger in the insula. Overall, ROI analysis confirmed that the dorsal anterior cingulate cortex encoded choice entropy. A specific role of the insula in encoding outcome entropy was found with voxel-based analysis but could not be confirmed on ROIs. Further studies are thus needed to test the existence of a complete double dissociation.

# 3 Task

## 3.1 Instructions

In the experiment, you will be given the opportunity to buy gambles at prices we post. You will start out with play money. If you decide to buy a gamble, the price we quoted is subtracted from your play money, while the earnings from the gamble is added. The outcome of each gamble is based on a random drawing of a ball from a bin. Balls within each bin are distinguished by color. There may be many balls of the same color, but you will not know how many... To give you an idea, the computer will draw several times a ball from the bin.

Like in standard lotteries, each ball is labeled with a number. This number is the same for balls of the same color. This number determines how much you earn when a ball is drawn.... For instance, if the orange balls are labeled “9”, you make 9 francs every time an orange ball is drawn.

Occasionally, we may change the labels without changing the composition of the bin (number of balls of each color). We will tell you when that happens... At that point, the computer will draw several times one ball, before you make any

decision whether to buy into the gamble or not.

Whenever we draw a ball from a bin, we replace it, so the number of balls does not change from one drawing to another, until of course we change the composition of the bin.

Before you decide to buy into a gamble, we will tell you whether the outcome will be known in advance. If it is not the instructions are in red. When we tell you the outcome in advance the instructions are in green. In any case, a “yes/no” instruction will appear after a few seconds. Then you have 15 seconds to decide to buy into a gamble. A countdown displays how much time you have left. If you don’t decide within 15 sec, the computer will make the decision at random.

So, the sequence of events is as follows. First, we show you a bin: you will be told which colors are in the bin and what label (payoff) is associated with each color, but not how many balls of each color there are. Then the computer will draw several times a ball from the bin and you’ll see the corresponding outcome (payoff). Then we move to the playing period: we quote a price and ask you whether you want to buy the gamble. If you don’t (push “right”) then the gamble is passed; if you do (push “left”), then the price and the outcome are recorded. Six prices will be presented successively and each time you have to decide whether or not to buy the gamble. You will know the outcome in advance for playing rounds 3 and 4 (instructions in green). You will not in the other playing rounds (1, 2, 5 and 6; instructions in red). At the end of the playing rounds, the cumulative net payoff will be displayed. That net payoff will be added to your play money. After the playing period, we either change the labels of the balls keeping the composition of the bin the same, or we change both. Don’t worry - we will tell you which case applies.

The money you earn (play money plus earnings from gambles you buy minus the prices you paid) is yours to keep, in addition to the traditional sign-up reward.

### **3.2 Duration and message**

The task started with a message displaying the initial play money. Each bin was preceded by a message indicating the beginning of the initial sampling stage (8 [s]), followed by a message indicating the beginning of the learning phase (4 [s]). The first drawing was shown 1.5 [s] after the disappearance of the last message. During the learning phase, each outcome was displayed during 1 [s]. The SOA between drawings followed a uniform distribution and ranged between 4 and 5 [s] (jittering).

After the end of the learning phase, a message indicated the beginning of the decision phase (4 [s]). The message showing the price in the decision phase “Do you want to pay X Frs to play this bin” lasted 3 [s]. After these 3 [s], the message “Yes / No” was displayed below the price message. The participant had to respond before 15 [s], otherwise the decision to buy the gamble or not was taken randomly by the computer. A count-down indicated the time left (updated every 5 [s]). After the participant answered, a feedback message indicated that the “Outcome was recorded” if the gamble was bought, or that the “Gamble was passed” otherwise (1 [s]). The gamble was played with 6 different prices: 2 in the active phase, 2 in the control phase, and 2 again in the active phase. After the 6 rounds, a message displayed the total net payoff of the current sampling stage along with the updated play money (10 [s]).

Then a message indicated the beginning of the resampling stage (8 [s]) followed by a message indicating the beginning of the learning phase (4 [s]). The first drawing was shown 1.5 [s] after the disappearance of the last message.

After bin 3 and 6, a resting period of 60 [s] was introduced. The message “Resting time (60 sec)” was displayed in the center of the screen.

## 4 Figures

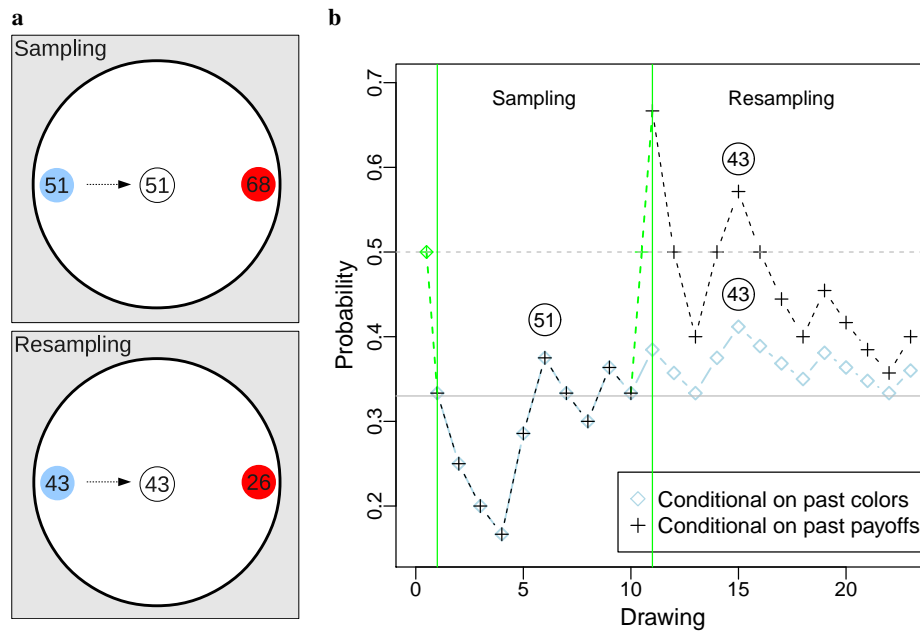

**Figure S1: Type of inference.** (a) Example of a two-color bin. The true probabilities equal  $1/3$  for blue and  $2/3$  for red. The payoff associated with each color change in the resampling stage but not the probabilities of the colors. (b) The figure displays the evolution of the posterior probabilities of the payoff associated to the blue ball for a given sequence of drawings. The updating process starts with a probability equal to 0.5 (horizontal dashed gray line). The first vertical green line indicates the first drawing of the initial sampling stage. The second vertical line indicates the first drawing after a change in the color-payoff association, keeping color probabilities the same (resampling stage). The dashed black line shows the probability calculated conditional on the observed payoffs (model M4a). It ignores that the same colors generate the payoffs in the sampling and resampling stages. Therefore, the probability is reset to  $1/2$ , prior to the first drawing of the resampling stage. The dashed blue line shows the probability calculated conditional on the hidden states (model M4). The probability is not reset to the prior at the beginning of the resampling stage and thus converges faster to the true probability (horizontal gray line). The probability regressed on BOLD response is the probability of the payoff shown in the center of the screen during the learning phase (stimulus). For instance, in the resampling stage it is the probability of 43 if a blue ball is drawn and of 26 if a red ball is drawn. The probability of the same stimulus (e.g. “43”) can be inferred from the history of the hidden states (model M4) or the history of observed payoffs (model M4a).

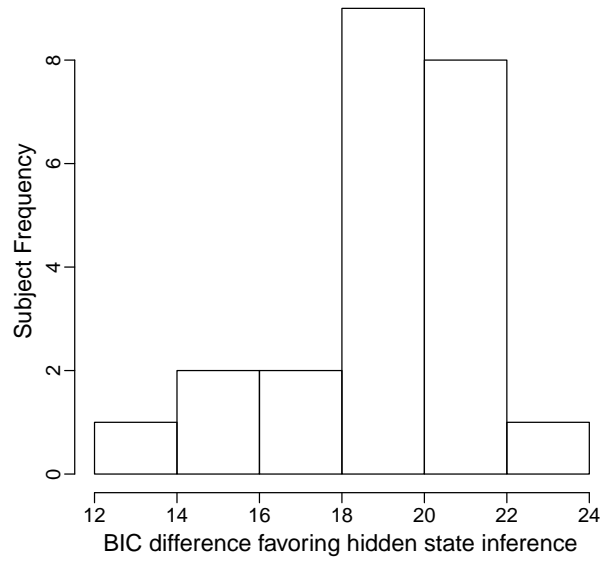

**Figure S2: Individual differences.** Gamble expected values inferred from hidden states (model M4) and observed payoffs (model M4a) were used to explain choices. The difference between the two BIC (M4a-M4) was calculated for each individual. It can be seen in the histogram that all differences were positive. Thus all participants were learning probabilities based on the state history.

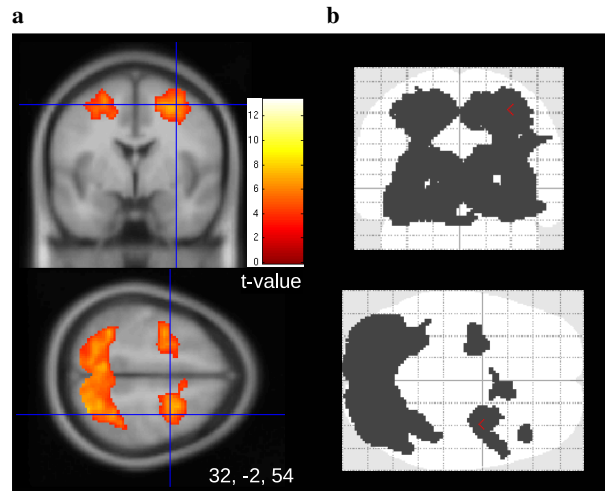

**Figure S3: Brain response to improbable stimuli.** (a) When a rare stimulus was observed in the learning period, BOLD activity increased in the occipital, superior parietal, and middle frontal gyrus increased. A significant effect was also observed in bilateral hippocampus (see Supplementary Tables). (b) Overlap between voxels encoding stimulus improbabilities (panel a) and the task-positive network (Fig. 6b, red voxels).

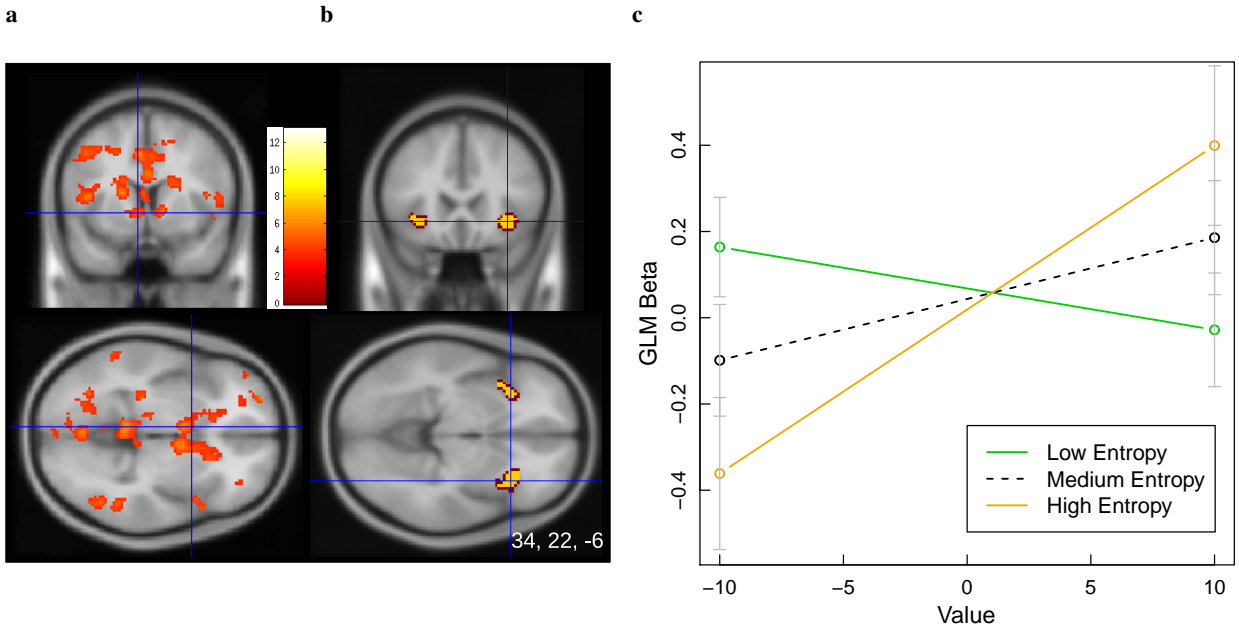

**Figure S4: Value and entropy.** (a) BOLD response to gamble expected value (net of the price) at decision time. Activation was mainly observed in the caudate but reached other regions of the brain. (b) Cross validation used to define the insula ROI. To avoid circularity, ROIs for each individual were determined based on the data of all other participants. ROI voxels common to all participants are in yellow (AND operator). ROI voxels belonging to at least one participant are in red (OR operator). This representation shows to which extent ROI definitions varied in the cross validation. (c) Overall, activity in bilateral insula increased with gamble expected value. The effect of value was amplified when the outcome was uncertain due to a high entropy (predicted activation and standard error).

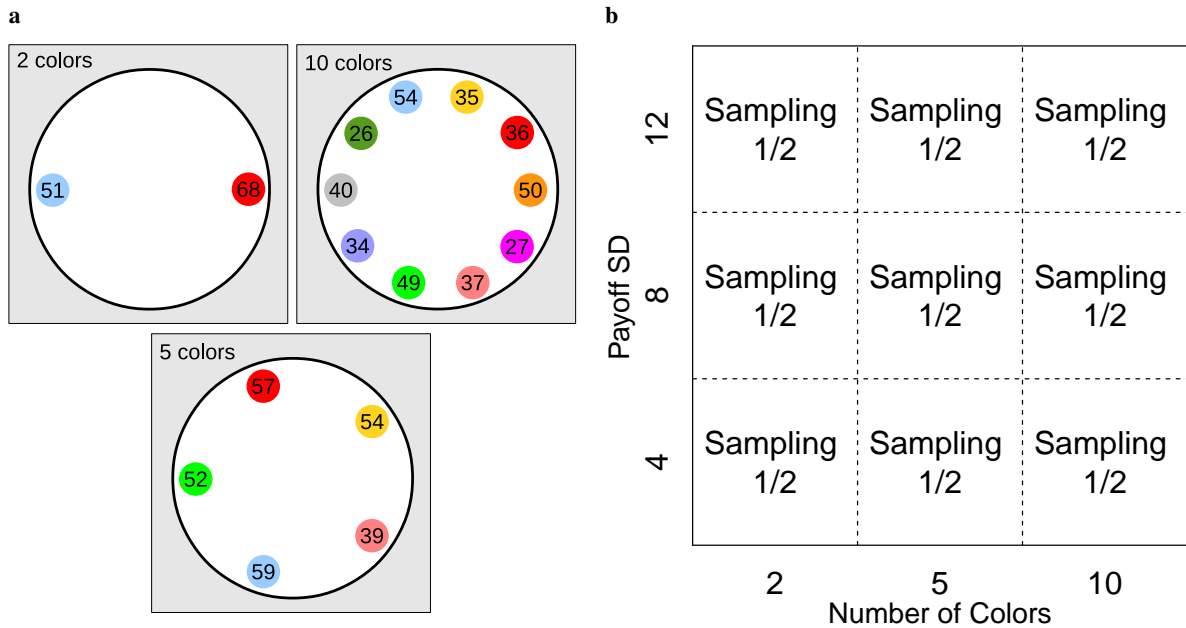

**Figure S5: Factorial design.** (a) Example of bins with 2, 5, or 10 colors. (b) Payoff standard deviation (SD 4, 8 or 12) was manipulated independently of the number of colors in the bin. This yielded to a total of 9 bins. Payoffs in the resampling stage were chosen so that the expected payoff changed, but not the payoff standard deviation.

## 5 Tables

**Table S1:** Voxel-Based Analysis: BOLD Response Regressed on Stimulus minus Absence of Stimulus

| Cluster                 | $PFDR$ | $k_E$ | $p_{unc}$ | $PFDR$ | $t$   | $z$  | $p_{unc}$ | $x$ | $y$ | $z$ |
|-------------------------|--------|-------|-----------|--------|-------|------|-----------|-----|-----|-----|
| Local Max               |        |       |           |        |       |      |           |     |     |     |
| Occipital/Hippocampus   | 0.000  | 26677 | 0.000     |        |       |      |           |     |     |     |
| L Cuneus                |        |       |           | 0.000  | 16.21 | 7.44 | 0.000     | -12 | -88 | 26  |
| L Calcarine             |        |       |           | 0.000  | 14.33 | 7.10 | 0.000     | -2  | -90 | 14  |
| R Calcarine             |        |       |           | 0.000  | 14.27 | 7.09 | 0.000     | 16  | -64 | 10  |
| R Mid+Sup Frontal Gyrus | 0.000  | 685   | 0.000     |        |       |      |           |     |     |     |
| R Sup Frontal           |        |       |           | 0.001  | 9.14  | 5.81 | 0.000     | 26  | 6   | 64  |
| R Mid Frontal           |        |       |           | 0.026  | 6.22  | 4.68 | 0.000     | 30  | -2  | 58  |
| R Mid Frontal           |        |       |           | 0.070  | 5.56  | 4.35 | 0.000     | 22  | 12  | 48  |
| R Mid Frontal Gyrus     | 0.000  | 613   | 0.000     |        |       |      |           |     |     |     |
| R Mid Frontal           |        |       |           | 0.007  | 7.05  | 5.05 | 0.000     | 38  | 52  | 8   |
| R Mid Frontal           |        |       |           | 0.131  | 5.13  | 4.12 | 0.000     | 48  | 44  | 16  |
| R Mid Frontal           |        |       |           | 0.132  | 5.12  | 4.11 | 0.000     | 52  | 28  | 32  |
| L Mid+Sup Frontal Gyrus | 0.000  | 461   | 0.000     |        |       |      |           |     |     |     |
| L Sup Frontal           |        |       |           | 0.017  | 6.51  | 4.81 | 0.000     | -26 | 2   | 68  |
| L Sup Frontal           |        |       |           | 0.028  | 6.15  | 4.64 | 0.000     | -26 | -6  | 60  |
| L Mid Frontal           |        |       |           | 0.106  | 5.29  | 4.20 | 0.000     | -26 | 2   | 54  |

Height threshold:  $T = 3.50$ ,  $p = 0.001$ ; Extent threshold:  $k = 300$  voxels,  $p = 0.000$ .

**Table S2:** Voxel-Based Analysis: BOLD Response Regressed on Stimulus Probabilities

| Cluster                  | $PFDR$ | $k_E$ | $p_{unc}$ | $PFDR$ | $t$  | $z$  | $p_{unc}$ | $x$ | $y$ | $z$ |
|--------------------------|--------|-------|-----------|--------|------|------|-----------|-----|-----|-----|
| Local Max                |        |       |           |        |      |      |           |     |     |     |
| R Angular Gyrus          | 0.000  | 457   | 0.000     |        |      |      |           |     |     |     |
| R Angular                |        |       |           | 0.002  | 9.68 | 5.99 | 0.000     | 56  | -60 | 38  |
| R Angular                |        |       |           | 0.010  | 7.49 | 5.23 | 0.000     | 50  | -66 | 42  |
| R Angular                |        |       |           | 0.023  | 6.92 | 4.99 | 0.000     | 58  | -62 | 28  |
| Medial Prefrontal Cortex | 0.000  | 1864  | 0.000     |        |      |      |           |     |     |     |
| Ventral Ant Cingulate    |        |       |           | 0.005  | 8.51 | 5.60 | 0.000     | -4  | 24  | -6  |
| Sup Frontal Gyrus        |        |       |           | 0.136  | 5.52 | 4.33 | 0.000     | -6  | 46  | 52  |
| Ant Cingulate            |        |       |           | 0.178  | 5.19 | 4.15 | 0.000     | 0   | 44  | 10  |
| L Angular Gyrus          | 0.000  | 504   | 0.000     |        |      |      |           |     |     |     |
| L Angular                |        |       |           | 0.005  | 8.26 | 5.52 | 0.000     | -52 | -70 | 30  |
| L Angular                |        |       |           | 0.005  | 8.14 | 5.47 | 0.000     | -56 | -62 | 36  |
| L Angular                |        |       |           | 0.007  | 7.76 | 5.33 | 0.000     | -46 | -72 | 40  |

Height threshold:  $T = 3.50$ ,  $p = 0.001$ ; Extent threshold:  $k = 100$  voxels,  $p = 0.016$ .

**Table S3: Voxel-Based Analysis: BOLD Response Regressed on Stimulus Improbabilities**

| Cluster             | <i>pFDR</i> | <i>k<sub>E</sub></i> | <i>p<sub>unc</sub></i> | <i>pFDR</i> | <i>t</i> | <i>z</i> | <i>p<sub>unc</sub></i> | <i>x</i> | <i>y</i> | <i>z</i> |
|---------------------|-------------|----------------------|------------------------|-------------|----------|----------|------------------------|----------|----------|----------|
| Local Max           |             |                      |                        |             |          |          |                        |          |          |          |
| Occipital           | 0.000       | 21784                | 0.000                  |             |          |          |                        |          |          |          |
| L Fusiform          |             |                      |                        | 0.000       | 13.37    | 6.91     | 0.000                  | -34      | -76      | -14      |
| R Occipital Sup     |             |                      |                        | 0.000       | 13.23    | 6.88     | 0.000                  | 26       | -66      | 32       |
| R Inf Occipital     |             |                      |                        | 0.000       | 11.00    | 6.36     | 0.000                  | 42       | -70      | -14      |
| R Frontal           | 0.000       | 1222                 | 0.000                  |             |          |          |                        |          |          |          |
| R Sup Frontal Gyrus |             |                      |                        | 0.004       | 7.14     | 5.08     | 0.000                  | 26       | 4        | 54       |
| R Suppl Motor       |             |                      |                        | 0.071       | 5.17     | 4.14     | 0.000                  | 6        | 14       | 48       |
| R Mid Cingulate     |             |                      |                        | 0.111       | 4.90     | 3.99     | 0.000                  | 12       | 18       | 42       |
| L Frontal           | 0.000       | 690                  | 0.000                  |             |          |          |                        |          |          |          |
| L Precentral        |             |                      |                        | 0.004       | 7.03     | 5.04     | 0.000                  | -34      | -6       | 52       |
| L Sup Frontal       |             |                      |                        | 0.017       | 6.10     | 4.62     | 0.000                  | -24      | -4       | 56       |
| L Sup Frontal       |             |                      |                        | 0.071       | 5.17     | 4.14     | 0.000                  | -18      | -6       | 50       |
| L Hippocampus       | 0.005       | 175                  | 0.002                  |             |          |          |                        |          |          |          |
| L Hippocampus       |             |                      |                        | 0.012       | 6.32     | 4.72     | 0.000                  | -20      | -30      | -4       |
| L Hippocampus       |             |                      |                        | 0.153       | 4.72     | 3.88     | 0.000                  | -20      | -30      | 8        |
| R Precentral        | 0.002       | 226                  | 0.001                  |             |          |          |                        |          |          |          |
| R Precentral        |             |                      |                        | 0.021       | 5.96     | 4.55     | 0.000                  | 46       | 6        | 32       |
| R Hippocampus       | 0.001       | 306                  | 0.000                  |             |          |          |                        |          |          |          |
| R Hippocampus       |             |                      |                        | 0.023       | 5.89     | 4.51     | 0.000                  | 22       | -30      | 2        |
| R Hippocampus       |             |                      |                        | 0.458       | 4.06     | 3.47     | 0.000                  | 26       | -22      | -6       |
| R Thalamus          |             |                      |                        | 0.841       | 3.62     | 3.17     | 0.001                  | 12       | -20      | 12       |
| R Mid Frontal Gyrus | 0.010       | 144                  | 0.005                  |             |          |          |                        |          |          |          |
| R Mid Frontal Gyrus |             |                      |                        | 0.029       | 5.73     | 4.43     | 0.000                  | 40       | 32       | 22       |

Height threshold:  $T = 3.50$ ,  $p = 0.001$ ; Extent threshold:  $k = 100$  voxels,  $p = 0.016$ .

**Table S4: Voxel-Based Analysis: BOLD Response Regressed on Probabilities / Positive Stimuli**

| Cluster                  | <i>pFDR</i> | <i>k<sub>E</sub></i> | <i>p<sub>unc</sub></i> | <i>pFDR</i> | <i>t</i> | <i>z</i> | <i>p<sub>unc</sub></i> | <i>x</i> | <i>y</i> | <i>z</i> |
|--------------------------|-------------|----------------------|------------------------|-------------|----------|----------|------------------------|----------|----------|----------|
| Local Max                |             |                      |                        |             |          |          |                        |          |          |          |
| Medial Prefrontal Cortex | 0.000       | 1368                 | 0.000                  |             |          |          |                        |          |          |          |
| Ventral Ant Cingulate    |             |                      |                        | 0.008       | 8.71     | 5.67     | 0.000                  | -4       | 24       | -2       |
| Ant Cingulate            |             |                      |                        | 0.053       | 6.53     | 4.82     | 0.000                  | 0        | 52       | 12       |
| Ant Cingulate            |             |                      |                        | 0.089       | 5.84     | 4.49     | 0.000                  | -4       | 52       | 2        |
| R Angular Gyrus          | 0.001       | 286                  | 0.000                  |             |          |          |                        |          |          |          |
| R Angular                |             |                      |                        | 0.051       | 6.87     | 4.97     | 0.000                  | 56       | -64      | 34       |
| R Angular                |             |                      |                        | 0.062       | 6.38     | 4.75     | 0.000                  | 56       | -66      | 26       |
| R Angular                |             |                      |                        | 0.083       | 5.91     | 4.52     | 0.000                  | 66       | -42      | 36       |
| L Angular                | 0.002       | 253                  | 0.000                  |             |          |          |                        |          |          |          |
| L Angular                |             |                      |                        | 0.051       | 6.72     | 4.90     | 0.000                  | -46      | -72      | 40       |
| L Angular                |             |                      |                        | 0.051       | 6.65     | 4.87     | 0.000                  | -54      | -64      | 38       |
| L Angular                |             |                      |                        | 0.071       | 6.13     | 4.63     | 0.000                  | -52      | -70      | 32       |
| Sup Frontal Gyrus        | 0.000       | 400                  | 0.000                  |             |          |          |                        |          |          |          |
| L Sup Frontal Gyrus      |             |                      |                        | 0.051       | 6.69     | 4.89     | 0.000                  | -10      | 48       | 46       |
| R Sup Frontal Gyrus      |             |                      |                        | 0.071       | 6.14     | 4.64     | 0.000                  | 12       | 36       | 48       |
| L Sup Frontal Gyrus      |             |                      |                        | 0.101       | 5.70     | 4.42     | 0.000                  | -8       | 42       | 54       |

Height threshold:  $T = 3.50$ ,  $p = 0.001$ ; Extent threshold:  $k = 100$  voxels,  $p = 0.012$ .

**Table S5: Voxel-Based Analysis: BOLD Response Regressed on Probabilities / Negative Stimuli**

| Cluster                  | $p_{FDR}$ | $k_E$ | $p_{unc}$ |           |      |      |           |     |     |     |
|--------------------------|-----------|-------|-----------|-----------|------|------|-----------|-----|-----|-----|
| Local Max                |           |       |           | $p_{FDR}$ | $t$  | $z$  | $p_{unc}$ | $x$ | $y$ | $z$ |
| R Angular Gyrus          | 0.000     | 378   | 0.000     |           |      |      |           |     |     |     |
| R Angular                |           |       |           | 0.022     | 7.77 | 5.33 | 0.000     | 56  | −60 | 40  |
| R Angular                |           |       |           | 0.022     | 7.46 | 5.21 | 0.000     | 50  | −66 | 42  |
| R Angular                |           |       |           | 0.084     | 5.95 | 4.55 | 0.000     | 56  | −64 | 30  |
| L Angular Gyrus          | 0.000     | 451   | 0.000     |           |      |      |           |     |     |     |
| L Angular                |           |       |           | 0.022     | 7.24 | 5.13 | 0.000     | −52 | −70 | 30  |
| L Angular                |           |       |           | 0.056     | 6.33 | 4.73 | 0.000     | −46 | −62 | 48  |
| L Angular                |           |       |           | 0.369     | 4.78 | 3.92 | 0.000     | −42 | −78 | 34  |
| Medial Prefrontal Cortex | 0.000     | 358   | 0.000     |           |      |      |           |     |     |     |
| Ventral Ant Cingulate    |           |       |           | 0.023     | 7.05 | 5.04 | 0.000     | −4  | 26  | −8  |
| VMPFC                    |           |       |           | 0.366     | 4.86 | 3.96 | 0.000     | 0   | 42  | −12 |
| VMPFC                    |           |       |           | 0.895     | 3.78 | 3.28 | 0.001     | 0   | 52  | −6  |

Height threshold:  $T = 3.50$ ,  $p = 0.001$ ; Extent threshold:  $k = 100$  voxels,  $p = 0.013$ .

**Table S6: ROI Analysis: Effect of Locations and Nbr. of States**

| Variable           | <i>Estimate</i> | <i>Lower</i> | <i>Upper</i> | <i>SE</i> | <i>Df</i> | <i>t</i> | <i>p</i> |
|--------------------|-----------------|--------------|--------------|-----------|-----------|----------|----------|
| Fixed effect       |                 |              |              |           |           |          |          |
| Medial Prefrontal  | −0.111          | −0.592       | 0.371        | 0.246     | 14670     | −0.45    | 0.652    |
| L Angular          | 0.257           | −0.219       | 0.734        | 0.243     | 14670     | 1.06     | 0.290    |
| R Angular          | 0.593*          | 0.130        | 1.057        | 0.236     | 14670     | 2.51     | 0.012    |
| Probability        | 2.086***        | 1.221        | 2.951        | 0.441     | 14670     | 4.73     | 0.000    |
| Nbr States         | 0.028           | −0.049       | 0.106        | 0.040     | 14670     | 0.71     | 0.476    |
| Prob x L Angular   | 0.186           | −0.527       | 0.899        | 0.364     | 14670     | 0.51     | 0.610    |
| Prob x R Angular   | −0.066          | −0.733       | 0.600        | 0.340     | 14670     | −0.19    | 0.846    |
| Prob x Nbr States  | 0.045           | −0.184       | 0.275        | 0.117     | 14670     | 0.39     | 0.698    |
| Random effect (SD) |                 |              |              |           |           |          |          |
| Medial Prefrontal  | 1.076           | —            | —            | —         | —         | —        | —        |
| L Angular          | 1.090           | —            | —            | —         | —         | —        | —        |
| R Angular          | 1.055           | —            | —            | —         | —         | —        | —        |
| Probability        | 1.120           | —            | —            | —         | —         | —        | —        |
| Nbr States         | 0.108           | —            | —            | —         | —         | —        | —        |
| Prob x L Angular   | 0.807           | —            | —            | —         | —         | —        | —        |
| Prob x R Angular   | 0.522           | —            | —            | —         | —         | —        | —        |
| Prob x Nbr States  | 0.382           | —            | —            | —         | —         | —        | —        |
| Error              | 3.390           | —            | —            | —         | —         | —        | —        |

\*0 not included in the 95% Confidence Interval; Nbr. data = 14700;

The F statistic for the interaction ROI Location x Probability was not significant,  $F(2, 14670) = 0.23$ ,  $p = .79$ .

**Table S7: ROI Analysis: BOLD Response Regressed on Probabilities for each Nbr. of States**

| Variable           | <i>Estimate</i> | <i>Lower</i> | <i>Upper</i> | <i>SE</i> | <i>Df</i> | <i>t</i> | <i>p</i> |
|--------------------|-----------------|--------------|--------------|-----------|-----------|----------|----------|
| Fixed effect       |                 |              |              |           |           |          |          |
| Medial Prefrontal  | −0.132          | −0.706       | 0.441        | 0.293     | 14670     | −0.45    | 0.651    |
| L Angular          | 0.228           | −0.247       | 0.704        | 0.243     | 14670     | 0.94     | 0.347    |
| R Angular          | 0.604**         | 0.145        | 1.062        | 0.234     | 14670     | 2.58     | 0.010    |
| 2 States           | −0.017          | −0.433       | 0.398        | 0.212     | 14670     | −0.08    | 0.935    |
| 10 States          | 0.301           | −0.427       | 1.029        | 0.371     | 14670     | 0.81     | 0.417    |
| Prob:2 States      | 1.788***        | 1.037        | 2.539        | 0.383     | 14670     | 4.67     | 0.000    |
| Prob:5 States      | 2.158**         | 0.757        | 3.560        | 0.715     | 14670     | 3.02     | 0.003    |
| Prob:10 States     | 2.703**         | 0.778        | 4.627        | 0.982     | 14670     | 2.75     | 0.006    |
| Random effect (SD) |                 |              |              |           |           |          |          |
| Medial Prefrontal  | 1.229           | —            | —            | —         | —         | —        | —        |
| L Angular          | 1.116           | —            | —            | —         | —         | —        | —        |
| R Angular          | 1.072           | —            | —            | —         | —         | —        | —        |
| 2 States           | 0.736           | —            | —            | —         | —         | —        | —        |
| 10 States          | 0.539           | —            | —            | —         | —         | —        | —        |
| Prob:2 States      | 1.085           | —            | —            | —         | —         | —        | —        |
| Prob:5 States      | 2.163           | —            | —            | —         | —         | —        | —        |
| Prob:10 States     | 1.406           | —            | —            | —         | —         | —        | —        |
| Error              | 3.380           | —            | —            | —         | —         | —        | —        |

\*0 not included in the 95% Confidence Interval; Nbr. data = 14700.

**Table S8:** ROI Analysis: BOLD Response Regressed on Stimulus Probabilities (linear)

| Variable           | <i>Estimate</i> | <i>Lower</i> | <i>Upper</i> | <i>SE</i> | <i>Df</i> | <i>t</i> | <i>p</i> |
|--------------------|-----------------|--------------|--------------|-----------|-----------|----------|----------|
| Fixed effect       |                 |              |              |           |           |          |          |
| $\beta_0$          | -0.810***       | -1.273       | -0.348       | 0.236     | 14676     | -3.44    | 0.001    |
| $\beta_1$          | 1.844***        | 1.289        | 2.399        | 0.283     | 14676     | 6.51     | 0.000    |
| Random effect (SD) |                 |              |              |           |           |          |          |
| $\beta_0$          | 1.101           | —            | —            | —         | —         | —        | —        |
| $\beta_1$          | 1.192           | —            | —            | —         | —         | —        | —        |
| Error              | 3.472           | —            | —            | —         | —         | —        | —        |

\*0 not included in the 95% Confidence Interval; Nbr. data = 14700;  
 $\beta_0$  = intercept,  $\beta_1$  = slope.

**Table S9:** ROI Analysis: BOLD Response Regressed on Stimulus Probabilities (non-linear)

| Variable      | <i>Estimate</i> | <i>Lower</i> | <i>Upper</i> | <i>SE</i> | <i>Df</i> | <i>t</i> | <i>p</i> |
|---------------|-----------------|--------------|--------------|-----------|-----------|----------|----------|
| Fixed Effect  |                 |              |              |           |           |          |          |
| $\beta_0$     | -0.63**         | -1.05        | -0.20        | 0.22      | 14675     | -2.91    | .00      |
| $\beta_1$     | 1.63***         | 1.39         | 1.86         | 0.12      | 14675     | 13.38    | .00      |
| $\gamma'$     | 0.49            | -0.29        | 1.26         | 0.39      | 14675     | 1.23     | .22      |
| Random Effect |                 |              |              |           |           |          |          |
| $\beta_0$     | 0.90            | —            | —            | —         | —         | —        | —        |
| $\beta_1$     | 0.00            | —            | —            | —         | —         | —        | —        |
| $\varepsilon$ | 3.48            | —            | —            | —         | —         | —        | —        |

\*0 not in 95% Confidence Interval; Nbr. data = 14700;  $\beta_0$  = intercept,  $\beta_1$  = slope,  $\gamma' = \gamma - 1$ ,  $\gamma$  = probability weighting,  $\varepsilon$  = error;  
The random effect for  $\gamma$  was negligible and was thus removed from the model.

**Table S10:** Voxel-Based Analysis: Increase in Connectivity during the Learning Phase

| Cluster                  | <i>PFDR</i> | <i>k<sub>E</sub></i> | <i>p<sub>unc</sub></i> |             |          |          |                        |          |          |          |
|--------------------------|-------------|----------------------|------------------------|-------------|----------|----------|------------------------|----------|----------|----------|
| Local Max                |             |                      |                        | <i>PFDR</i> | <i>t</i> | <i>z</i> | <i>p<sub>unc</sub></i> | <i>x</i> | <i>y</i> | <i>z</i> |
| Precuneus/Cingulate      | 0.000       | 5185                 | 0.000                  |             |          |          |                        |          |          |          |
| Mid Cingulate            |             |                      |                        | 0.000       | 14.58    | 7.15     | 0.000                  | 0        | -18      | 34       |
| Post Cingulate           |             |                      |                        | 0.000       | 12.28    | 6.67     | 0.000                  | 4        | -46      | 20       |
| Post Cingulate           |             |                      |                        | 0.000       | 10.98    | 6.35     | 0.000                  | -4       | -48      | 24       |
| L Angular Gyrus          | 0.000       | 1169                 | 0.000                  |             |          |          |                        |          |          |          |
| L Angular                |             |                      |                        | 0.000       | 11.24    | 6.42     | 0.000                  | -54      | -62      | 32       |
| Medial Prefrontal Cortex | 0.000       | 3846                 | 0.000                  |             |          |          |                        |          |          |          |
| Sup Frontal              |             |                      |                        | 0.000       | 10.90    | 6.33     | 0.000                  | -14      | 48       | 38       |
| Sup Frontal              |             |                      |                        | 0.001       | 9.23     | 5.84     | 0.000                  | -6       | 38       | 32       |
| Sup Frontal              |             |                      |                        | 0.001       | 8.80     | 5.70     | 0.000                  | 10       | 44       | 44       |
| Occipital                | 0.000       | 1283                 | 0.000                  |             |          |          |                        |          |          |          |
| R Calcarine              |             |                      |                        | 0.054       | 5.85     | 4.49     | 0.000                  | 14       | -90      | 12       |
| L Lingual                |             |                      |                        | 0.072       | 5.66     | 4.40     | 0.000                  | -8       | -96      | -16      |
| R Fusiform               |             |                      |                        | 0.074       | 5.62     | 4.38     | 0.000                  | 28       | -62      | -8       |
| R Angular Gyrus          | 0.000       | 391                  | 0.000                  |             |          |          |                        |          |          |          |
| R Angular                |             |                      |                        | 0.124       | 5.14     | 4.12     | 0.000                  | 62       | -50      | 40       |
| R Angular                |             |                      |                        | 0.129       | 5.11     | 4.10     | 0.000                  | 48       | -54      | 34       |
| R Angular                |             |                      |                        | 0.132       | 5.07     | 4.08     | 0.000                  | 58       | -62      | 30       |

Height threshold:  $T = 3.50$ ,  $p = 0.001$ ; Extent threshold:  $k = 300$  voxels,  $p = 0.000$ .

**Table S11:** Voxel-Based Analysis: BOLD Response Regressed on Active minus Control Decision

| Cluster                        | <i>PFDR</i> | <i>k<sub>E</sub></i> | <i>p<sub>unc</sub></i> |             |          |          |                        |          |          |          |
|--------------------------------|-------------|----------------------|------------------------|-------------|----------|----------|------------------------|----------|----------|----------|
| Local Max                      |             |                      |                        | <i>PFDR</i> | <i>t</i> | <i>z</i> | <i>p<sub>unc</sub></i> | <i>x</i> | <i>y</i> | <i>z</i> |
| Occipital/Hippocampus/Striatum | 0.000       | 20858                | 0.000                  |             |          |          |                        |          |          |          |
| R Cuneus                       |             |                      |                        | 0.001       | 10.63    | 6.26     | 0.000                  | 8        | -86      | 28       |
| L Cuneus                       |             |                      |                        | 0.001       | 10.50    | 6.22     | 0.000                  | -2       | -84      | 20       |
| R Sup Occipital                |             |                      |                        | 0.001       | 10.08    | 6.10     | 0.000                  | 20       | -82      | 38       |
| R Insula/Inf Frontal           | 0.000       | 1599                 | 0.000                  |             |          |          |                        |          |          |          |
| R Insula                       |             |                      |                        | 0.004       | 7.47     | 5.22     | 0.000                  | 38       | 24       | -8       |
| R Inf Frontal                  |             |                      |                        | 0.018       | 6.44     | 4.78     | 0.000                  | 54       | 10       | 20       |
| R Insula                       |             |                      |                        | 0.031       | 6.04     | 4.59     | 0.000                  | 30       | 32       | -4       |

Height threshold:  $T = 3.50$ ,  $p = 0.001$ ; Extent threshold:  $k = 300$  voxels,  $p = 0.000$ .

**Table S12:** Voxel-Based Analysis: BOLD Response Regressed on Expected Value

| Cluster             | <i>pFDR</i> | <i>k<sub>E</sub></i> | <i>p<sub>unc</sub></i> | <i>pFDR</i> | <i>t</i> | <i>z</i> | <i>p<sub>unc</sub></i> | <i>x</i> | <i>y</i> | <i>z</i> |
|---------------------|-------------|----------------------|------------------------|-------------|----------|----------|------------------------|----------|----------|----------|
| Local Max           |             |                      |                        |             |          |          |                        |          |          |          |
| Undefined           | 0.000       | 24136                | 0.000                  |             |          |          |                        |          |          |          |
| R Caudate           |             |                      |                        | 0.090       | 8.12     | 5.47     | 0.000                  | 26       | 24       | 20       |
| L Supramarginal     |             |                      |                        | 0.090       | 7.98     | 5.41     | 0.000                  | -44      | -42      | 34       |
| Cingulate Gyrus     |             |                      |                        | 0.090       | 7.80     | 5.35     | 0.000                  | -14      | -38      | 36       |
| L Frontal           | 0.008       | 169                  | 0.000                  |             |          |          |                        |          |          |          |
| L Sup Frontal Gyrus |             |                      |                        | 0.143       | 5.76     | 4.45     | 0.000                  | -28      | 60       | 0        |
| Mid Frontal Gyrus   |             |                      |                        | 0.537       | 4.07     | 3.48     | 0.000                  | -38      | 50       | 0        |
| Undefined           | 0.005       | 195                  | 0.000                  |             |          |          |                        |          |          |          |
| R Operculum         |             |                      |                        | 0.171       | 5.44     | 4.29     | 0.000                  | 44       | 8        | 12       |
| R Inf Frontal Gyrus |             |                      |                        | 0.198       | 5.22     | 4.17     | 0.000                  | 54       | 14       | 4        |
| R Insula            |             |                      |                        | 0.386       | 4.44     | 3.71     | 0.000                  | 48       | 10       | -2       |
| R Orbito frontal    | 0.018       | 136                  | 0.001                  |             |          |          |                        |          |          |          |
| R Orbito Frontal    |             |                      |                        | 0.198       | 5.24     | 4.18     | 0.000                  | 28       | 42       | -14      |
| R Orbito Frontal    |             |                      |                        | 0.286       | 4.73     | 3.89     | 0.000                  | 38       | 50       | -12      |
| R Orbito Frontal    |             |                      |                        | 0.507       | 4.14     | 3.52     | 0.000                  | 34       | 42       | -4       |
| R Inf Frontal Gyrus | 0.005       | 189                  | 0.000                  |             |          |          |                        |          |          |          |
| R Inf Frontal Gyrus |             |                      |                        | 0.212       | 5.14     | 4.12     | 0.000                  | 50       | 18       | 22       |
| R Inf Frontal Gyrus |             |                      |                        | 0.420       | 4.35     | 3.65     | 0.000                  | 42       | 22       | 16       |
| R Inf Frontal Gyrus |             |                      |                        | 0.507       | 4.14     | 3.52     | 0.000                  | 58       | 18       | 30       |

Height threshold:  $T = 3.50$ ,  $p = 0.001$ ; Extent threshold:  $k = 100$  voxels,  $p = 0.003$ .

**Table S13:** Voxel-Based Analysis: BOLD Response Regressed on Expected Value x Outcome Entropy

| Cluster   | <i>pFDR</i> | <i>k<sub>E</sub></i> | <i>p<sub>unc</sub></i> | <i>pFDR</i> | <i>t</i> | <i>z</i> | <i>p<sub>unc</sub></i> | <i>x</i> | <i>y</i> | <i>z</i> |
|-----------|-------------|----------------------|------------------------|-------------|----------|----------|------------------------|----------|----------|----------|
| Local Max |             |                      |                        |             |          |          |                        |          |          |          |
| R Insula  | 0.011       | 165                  | 0.000                  |             |          |          |                        |          |          |          |
| R Insula  |             |                      |                        | 0.257       | 6.42     | 4.77     | 0.000                  | 32       | 24       | -6       |
| L Insula  | 0.022       | 124                  | 0.001                  |             |          |          |                        |          |          |          |
| L Insula  |             |                      |                        | 0.721       | 5.11     | 4.10     | 0.000                  | -34      | 14       | -14      |
| L Insula  |             |                      |                        | 0.742       | 4.85     | 3.96     | 0.000                  | -30      | 24       | -8       |
| L Insula  |             |                      |                        | 0.742       | 4.72     | 3.88     | 0.000                  | -36      | 16       | -2       |

Height threshold:  $T = 3.50$ ,  $p = 0.001$ ; Extent threshold:  $k = 100$  voxels,  $p = 0.003$ .

**Table S14:** ROI Analysis: BOLD Response Regressed on Expected Value x Outcome Entropy

| Variable           | <i>Estimate</i> | <i>Lower</i> | <i>Upper</i> | <i>SE</i> | <i>Df</i> | <i>t</i> | <i>p</i> |
|--------------------|-----------------|--------------|--------------|-----------|-----------|----------|----------|
| Fixed effect       |                 |              |              |           |           |          |          |
| L Insula           | -0.083          | -0.287       | 0.121        | 0.104     | 3253      | -0.80    | 0.423    |
| R Insula           | 0.220**         | 0.071        | 0.369        | 0.076     | 3253      | 2.90     | 0.004    |
| Expected Value     | 0.065*          | 0.012        | 0.118        | 0.027     | 3253      | 2.39     | 0.017    |
| Entropy            | -0.038          | -0.118       | 0.042        | 0.041     | 3253      | -0.94    | 0.348    |
| Entropy x EV       | 0.078***        | 0.035        | 0.122        | 0.022     | 3253      | 3.51     | 0.000    |
| Random effect (SD) |                 |              |              |           |           |          |          |
| L Insula           | 0.484           | —            | —            | —         | —         | —        | —        |
| R Insula           | 0.323           | —            | —            | —         | —         | —        | —        |
| Expected Value     | 0.097           | —            | —            | —         | —         | —        | —        |
| Entropy            | 0.175           | —            | —            | —         | —         | —        | —        |
| Entropy x EV       | 0.067           | —            | —            | —         | —         | —        | —        |
| Error              | 1.001           | —            | —            | —         | —         | —        | —        |

\*0 not included in the 95% Confidence Interval; Nbr. data = 3280.

**Table S15:** Voxel-Based Analysis: BOLD Response Regressed on Choice Entropy

| Cluster                   | <i>PFDR</i> | <i>k<sub>E</sub></i> | <i>p<sub>unc</sub></i> | <i>PFDR</i> | <i>t</i> | <i>z</i> | <i>p<sub>unc</sub></i> | <i>x</i> | <i>y</i> | <i>z</i> |
|---------------------------|-------------|----------------------|------------------------|-------------|----------|----------|------------------------|----------|----------|----------|
| Local Max                 |             |                      |                        |             |          |          |                        |          |          |          |
| L Occipital/Parietal      | 0.000       | 385                  | 0.000                  |             |          |          |                        |          |          |          |
| L Sup Occipital           |             |                      |                        | 0.205       | 5.94     | 4.54     | 0.000                  | -20      | -70      | 48       |
| L Sup Parietal            |             |                      |                        | 0.221       | 5.52     | 4.33     | 0.000                  | -24      | -80      | 44       |
| L Mid Occipital           |             |                      |                        | 0.436       | 4.81     | 3.93     | 0.000                  | -28      | -74      | 32       |
| R Occipital/Parietal      | 0.000       | 404                  | 0.000                  |             |          |          |                        |          |          |          |
| R Sup Occipital           |             |                      |                        | 0.205       | 5.90     | 4.52     | 0.000                  | 30       | -74      | 46       |
| R Sup Parietal            |             |                      |                        | 0.367       | 5.10     | 4.10     | 0.000                  | 14       | -70      | 58       |
| R Precuneus               |             |                      |                        | 0.457       | 4.60     | 3.81     | 0.000                  | 16       | -60      | 42       |
| Ant Cingulate/Sup Frontal | 0.000       | 395                  | 0.000                  |             |          |          |                        |          |          |          |
| Sup Frontal Gyrus         |             |                      |                        | 0.205       | 5.82     | 4.48     | 0.000                  | -4       | 24       | 40       |
| Dorsal Ant Cingulate      |             |                      |                        | 0.424       | 4.92     | 4.00     | 0.000                  | 8        | 26       | 38       |
| Occipital                 | 0.000       | 613                  | 0.000                  |             |          |          |                        |          |          |          |
| R Cuneus                  |             |                      |                        | 0.341       | 5.18     | 4.15     | 0.000                  | 10       | -88      | 22       |
| L Cuneus                  |             |                      |                        | 0.436       | 4.83     | 3.95     | 0.000                  | -8       | -86      | 22       |
| R Calcarine               |             |                      |                        | 0.436       | 4.69     | 3.86     | 0.000                  | 2        | -86      | 14       |

Height threshold: T = 3.50, p = 0.001; Extent threshold: k = 300 voxels, p = 0.000.

**Table S16:** Voxel-Based Analysis: BOLD Response Regressed on Net Payoff

| Cluster           | <i>PFDR</i> | <i>k<sub>E</sub></i> | <i>p<sub>unc</sub></i> | <i>PFDR</i> | <i>t</i> | <i>z</i> | <i>p<sub>unc</sub></i> | <i>x</i> | <i>y</i> | <i>z</i> |
|-------------------|-------------|----------------------|------------------------|-------------|----------|----------|------------------------|----------|----------|----------|
| Local Max         |             |                      |                        |             |          |          |                        |          |          |          |
| R Caudate         | 0.000       | 479                  | 0.000                  |             |          |          |                        |          |          |          |
| R Caudate         |             |                      |                        | 0.373       | 6.07     | 4.60     | 0.000                  | 20       | 24       | 6        |
| R Caudate         |             |                      |                        | 0.373       | 5.95     | 4.54     | 0.000                  | 22       | 38       | 4        |
| R Caudate         |             |                      |                        | 0.373       | 5.41     | 4.27     | 0.000                  | 20       | 42       | 12       |
| L Putamen         | 0.008       | 269                  | 0.001                  |             |          |          |                        |          |          |          |
| L Putamen         |             |                      |                        | 0.373       | 5.81     | 4.47     | 0.000                  | -30      | 6        | -6       |
| L Putamen         |             |                      |                        | 0.601       | 4.61     | 3.81     | 0.000                  | -22      | 20       | -2       |
| L Putamen         |             |                      |                        | 0.601       | 4.54     | 3.77     | 0.000                  | -16      | 10       | -4       |
| Caudate           | 0.000       | 880                  | 0.000                  |             |          |          |                        |          |          |          |
| L Caudate         |             |                      |                        | 0.373       | 5.49     | 4.31     | 0.000                  | -14      | 26       | 14       |
| L Caudate         |             |                      |                        | 0.373       | 5.33     | 4.22     | 0.000                  | -4       | 20       | 12       |
| R Caudate         |             |                      |                        | 0.373       | 5.22     | 4.17     | 0.000                  | 6        | 28       | 10       |
| R Caudate/Putamen | 0.134       | 122                  | 0.012                  |             |          |          |                        |          |          |          |
| R Caudate         |             |                      |                        | 0.636       | 4.45     | 3.72     | 0.000                  | 26       | 4        | 30       |
| R Caudate         |             |                      |                        | 0.636       | 4.35     | 3.66     | 0.000                  | 40       | -2       | 24       |
| R Caudate         |             |                      |                        | 0.939       | 3.95     | 3.40     | 0.000                  | 20       | 6        | 24       |

Height threshold: T = 3.50, p = 0.001; Extent threshold: k = 100 voxels, p = 0.020.

**Table S17:** Voxel-Based Analysis: Connectivity in the Resting Phase

| Cluster                       | <i>PFDR</i> | <i>k<sub>E</sub></i> | <i>p<sub>unc</sub></i> | <i>PFDR</i> | <i>t</i> | <i>z</i> | <i>p<sub>unc</sub></i> | <i>x</i> | <i>y</i> | <i>z</i> |
|-------------------------------|-------------|----------------------|------------------------|-------------|----------|----------|------------------------|----------|----------|----------|
| Local Max                     |             |                      |                        |             |          |          |                        |          |          |          |
| MPFC/Cingulate/R Inf Temporal | 0.000       | 24153                | 0.000                  |             |          |          |                        |          |          |          |
| VMPFC                         |             |                      |                        | 0.000       | 18.39    | 7.77     | 0.000                  | 0        | 46       | -6       |
| Ant Cingulate                 |             |                      |                        | 0.000       | 16.42    | 7.47     | 0.000                  | 2        | 44       | 12       |
| VMPFC                         |             |                      |                        | 0.000       | 15.53    | 7.32     | 0.000                  | -6       | 44       | -16      |
| L Angular /Mid Temporal       | 0.000       | 2243                 | 0.000                  |             |          |          |                        |          |          |          |
| L Angular Gyrus               |             |                      |                        | 0.000       | 15.29    | 7.28     | 0.000                  | -46      | -66      | 30       |
| L Mid Temporal                |             |                      |                        | 0.001       | 13.79    | 7.00     | 0.000                  | -56      | -58      | 20       |
| L Mid Temporal                |             |                      |                        | 0.001       | 13.59    | 6.96     | 0.000                  | -52      | -66      | 22       |
| R Angular Gyrus               | 0.000       | 1355                 | 0.000                  |             |          |          |                        |          |          |          |
| R Angular Gyrus               |             |                      |                        | 0.005       | 11.86    | 6.57     | 0.000                  | 42       | -64      | 26       |
| R Angular Gyrus               |             |                      |                        | 0.007       | 11.33    | 6.44     | 0.000                  | 50       | -66      | 30       |
| R Angular Gyrus               |             |                      |                        | 0.013       | 10.45    | 6.21     | 0.000                  | 54       | -60      | 26       |
| L Mid Temporal                | 0.000       | 1239                 | 0.000                  |             |          |          |                        |          |          |          |
| L Mid Temporal                |             |                      |                        | 0.008       | 11.04    | 6.37     | 0.000                  | -58      | -10      | -16      |
| L Mid Temporal                |             |                      |                        | 0.010       | 10.77    | 6.29     | 0.000                  | -62      | -20      | -18      |
| L Mid Temporal                |             |                      |                        | 0.011       | 10.63    | 6.26     | 0.000                  | -60      | -12      | -6       |

Height threshold: T = 7.00, p = 0.000; Extent threshold: k = 300 voxels, p = 0.000.

**Table S18: Voxel-Based Analysis: BOLD Response Regressed on Task minus Resting Phase**

| Cluster                               | <i>PFDR</i> | <i>k<sub>E</sub></i> | <i>p<sub>unc</sub></i> |             |          |          |                        |          |          |          |
|---------------------------------------|-------------|----------------------|------------------------|-------------|----------|----------|------------------------|----------|----------|----------|
| Local Max                             |             |                      |                        | <i>PFDR</i> | <i>t</i> | <i>z</i> | <i>p<sub>unc</sub></i> | <i>x</i> | <i>y</i> | <i>z</i> |
| Occipital/ Sup Parietal/ L Precentral | 0.000       | 21707                | 0.000                  |             |          |          |                        |          |          |          |
| R Mid Occipital                       |             |                      |                        | 0.000       | 14.02    | 7.04     | 0.000                  | 30       | −66      | 34       |
| L Mid Occipital                       |             |                      |                        | 0.000       | 13.68    | 6.97     | 0.000                  | −32      | −88      | 12       |
| R Mid Occipital                       |             |                      |                        | 0.000       | 13.44    | 6.92     | 0.000                  | 32       | −72      | 24       |
| Supplementary Motor                   | 0.000       | 850                  | 0.000                  |             |          |          |                        |          |          |          |
| L Supplementary Motor                 |             |                      |                        | 0.000       | 9.01     | 5.77     | 0.000                  | −6       | 8        | 50       |
| R Supplementary Motor                 |             |                      |                        | 0.000       | 8.64     | 5.65     | 0.000                  | 8        | 16       | 50       |
| L Supplementary Motor                 |             |                      |                        | 0.185       | 4.60     | 3.81     | 0.000                  | −8       | −4       | 58       |
| R Frontal/Precentral Gyrus            | 0.000       | 937                  | 0.000                  |             |          |          |                        |          |          |          |
| R Mid Frontal                         |             |                      |                        | 0.001       | 8.23     | 5.51     | 0.000                  | 32       | −2       | 54       |
| R Sup Frontal                         |             |                      |                        | 0.048       | 5.46     | 4.30     | 0.000                  | 28       | 10       | 64       |
| R Mid Frontal Gyrus                   | 0.000       | 1044                 | 0.000                  |             |          |          |                        |          |          |          |
| R Mid Frontal                         |             |                      |                        | 0.001       | 7.66     | 5.29     | 0.000                  | 46       | 34       | 34       |
| R Mid Frontal                         |             |                      |                        | 0.003       | 7.15     | 5.09     | 0.000                  | 38       | 36       | 28       |
| R Mid Frontal                         |             |                      |                        | 0.006       | 6.77     | 4.93     | 0.000                  | 36       | 56       | −2       |

Height threshold:  $T = 3.50$ ,  $p = 0.001$ ; Extent threshold:  $k = 300$  voxels,  $p = 0.000$ .

**Table S19: Voxel-Based Analysis: BOLD Response Regressed on Resting Phase minus Task**

| Cluster                     | <i>PFDR</i> | <i>k<sub>E</sub></i> | <i>p<sub>unc</sub></i> |             |          |          |                        |          |          |          |
|-----------------------------|-------------|----------------------|------------------------|-------------|----------|----------|------------------------|----------|----------|----------|
| Local Max                   |             |                      |                        | <i>PFDR</i> | <i>t</i> | <i>z</i> | <i>p<sub>unc</sub></i> | <i>x</i> | <i>y</i> | <i>z</i> |
| MPFC/Cingulate              | 0.000       | 10583                | 0.000                  |             |          |          |                        |          |          |          |
| VMPFC                       |             |                      |                        | 0.000       | 11.60    | 6.51     | 0.000                  | 0        | 58       | −2       |
| VMPFC                       |             |                      |                        | 0.002       | 9.23     | 5.84     | 0.000                  | −6       | 38       | −10      |
| Posterior Cingulate         |             |                      |                        | 0.002       | 9.07     | 5.79     | 0.000                  | −8       | −56      | 14       |
| L Angular/Mid Occi+Temporal | 0.000       | 756                  | 0.000                  |             |          |          |                        |          |          |          |
| L Angular                   |             |                      |                        | 0.001       | 10.12    | 6.11     | 0.000                  | −42      | −74      | 40       |
| L Mid Occipital             |             |                      |                        | 0.003       | 8.70     | 5.67     | 0.000                  | −46      | −74      | 32       |
| L Mid Temporal              |             |                      |                        | 0.013       | 6.74     | 4.92     | 0.000                  | −42      | −64      | 22       |
| L Insula/Supramarginal      | 0.000       | 6019                 | 0.000                  |             |          |          |                        |          |          |          |
| L Insula                    |             |                      |                        | 0.002       | 8.90     | 5.74     | 0.000                  | −30      | 12       | −12      |
| L Supramarginal             |             |                      |                        | 0.004       | 8.13     | 5.47     | 0.000                  | −60      | −30      | 28       |
| L Insula                    |             |                      |                        | 0.005       | 7.90     | 5.38     | 0.000                  | −36      | 6        | −12      |
| R Angular/Sup Temporal      | 0.000       | 6235                 | 0.000                  |             |          |          |                        |          |          |          |
| R Angular                   |             |                      |                        | 0.004       | 8.15     | 5.48     | 0.000                  | 54       | −68      | 30       |
| R Sup Temporal              |             |                      |                        | 0.007       | 7.56     | 5.25     | 0.000                  | 52       | −22      | 14       |
| R Sup Temporal              |             |                      |                        | 0.008       | 7.33     | 5.16     | 0.000                  | 58       | −16      | 8        |
| L Sup Frontal               | 0.000       | 482                  | 0.000                  |             |          |          |                        |          |          |          |
| L Sup Frontal               |             |                      |                        | 0.018       | 6.42     | 4.77     | 0.000                  | −20      | 28       | 44       |
| L Sup Frontal               |             |                      |                        | 0.020       | 6.31     | 4.72     | 0.000                  | −14      | 38       | 46       |
| L Sup Frontal               |             |                      |                        | 0.043       | 5.67     | 4.41     | 0.000                  | −12      | 46       | 48       |

Height threshold:  $T = 3.50$ ,  $p = 0.001$ ; Extent threshold:  $k = 300$  voxels,  $p = 0.000$ .

**Table S20: ROI Analysis: Hidden States vs. Observed Payoffs Inference**

| Variable               | <i>Estimate</i> | <i>Lower</i> | <i>Upper</i> | <i>SE</i> | <i>Df</i> | <i>t</i> | <i>p</i> |
|------------------------|-----------------|--------------|--------------|-----------|-----------|----------|----------|
| Fixed effect           |                 |              |              |           |           |          |          |
| Medial Prefrontal      | −0.145          | −0.574       | 0.285        | 0.219     | 7344      | −0.66    | 0.509    |
| L Angular              | 0.034           | −0.453       | 0.520        | 0.248     | 7344      | 0.14     | 0.892    |
| R Angular              | 0.570*          | 0.075        | 1.064        | 0.252     | 7344      | 2.26     | 0.024    |
| Prob (from states, M4) | 1.287*          | 0.167        | 2.406        | 0.571     | 7344      | 2.25     | 0.024    |
| Prob (from obs, M4a)   | 0.730           | −0.740       | 2.201        | 0.750     | 7344      | 0.97     | 0.330    |
| Random effect (SD)     |                 |              |              |           |           |          |          |
| Medial Prefrontal      | 0.984           | —            | —            | —         | —         | —        | —        |
| L Angular              | 1.095           | —            | —            | —         | —         | —        | —        |
| R Angular              | 1.116           | —            | —            | —         | —         | —        | —        |
| Prob (from states, M4) | 1.478           | —            | —            | —         | —         | —        | —        |
| Prob (from obs, M4a)   | 2.712           | —            | —            | —         | —         | —        | —        |
| Error                  | 3.400           | —            | —            | —         | —         | —        | —        |

\*0 not included in the 95% Confidence Interval; Nbr. data = 7371 (resampling stage only);

The correlation between probabilities inferred from hidden states and observations was high (.92). However, the variation Inflation Factor was 6.5 for the inference from states and 6.6 for the inference from observations. Being smaller than 10, these values indicate that the high correlation had a limited impact on standard-errors. The p-values of the results are thus reliable.

## References

1. Stephan K, Penny W, Daunizeau J, Moran R, Friston K (2009) Bayesian model selection for group studies. *Neuroimage* 46: 1004–1017.
2. Kriegeskorte N, Simmons W, Bellgowan P, Baker C (2009) Circular analysis in systems neuroscience—the dangers of double dipping. *Nature Neuroscience* 12: 535.
3. Brett M, Anton JL, Valabregue R, Poline JB (2002) Region of interest analysis using an SPM toolbox. Presented at the 8th International Conference on Functional Mapping of the Human Brain, June 2-6, Sendai, Japan.
4. R Development Core Team (2010) R: A Language and Environment for Statistical Computing. R Foundation for Statistical Computing, Vienna, Austria. URL <http://www.r-project.org>.
5. Weissenbacher A, Kasess C, Gerstl F, Lanzenberger R, Moser E, et al. (2009) Correlations and anticorrelations in resting-state functional connectivity MRI: A quantitative comparison of preprocessing strategies. *Neuroimage* 47: 1408–1416.
